# Supplementary material for: Honeycomb-like micro-/nano-hierarchical porous germanium for high-performance lithium-ion battery anodes
Source: Royal Society of Chemistry journal article supplement (doi:10.1039/d4nj00224e), 2024-01-01
Supplement: d4nj00224e1.pdf [file d4nj00224e1.pdf]

## Supplementary materials

### Honeycomb-like micro-/nano-hierarchical porous germanium for high-performance lithium-ion battery anode

Ya Zheng<sup>a</sup>, Xiaocheng Li<sup>a, c\*</sup>, Juan Liu<sup>b</sup>, Xiaoyu Zhao<sup>a</sup>, Nengwen Ding<sup>a, c</sup>, Qian Zhang<sup>a, c\*</sup>,

Shengwen Zhong<sup>a</sup>

<sup>a</sup>Jiangxi Province Key Laboratory of Power Battery and Materials, Faculty of Materials Metallurgy and Chemistry, Jiangxi University of Science and Technology, Ganzhou 341000, P.R. China.

<sup>b</sup>Jiangxi Province Key Laboratory of Mining Engineering, School of Resources and environmental Engineering, Jiangxi University of Science and Technology, Ganzhou 341000, PR China.

<sup>c</sup>Yichun Lithium New Energy Industry Research Institute, Jiangxi University of Science and Technology, Yichun 360904 P.R. China

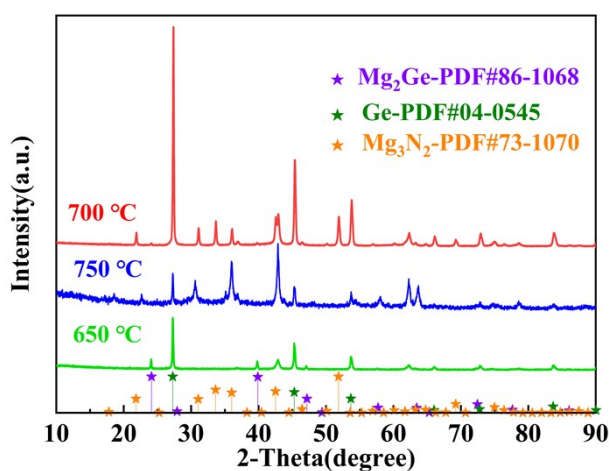

Fig. S1 XRD patterns of Mg<sub>2</sub>Ge after nitriding at different temperatures

---

\* Corresponding authors.

Email: xiaocheng\_li@jxust.edu.cn; zhangqian@jxust.edu.cn

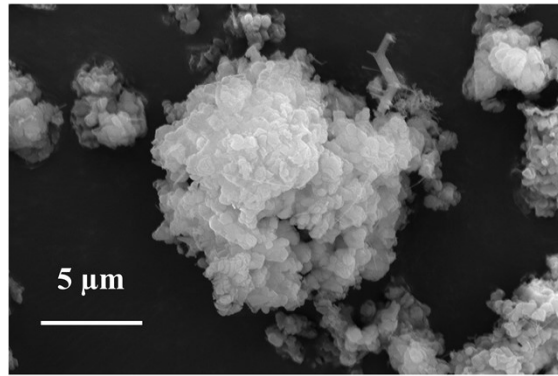

Fig. S2 SEM image of Mg<sub>2</sub>Ge after nitriding

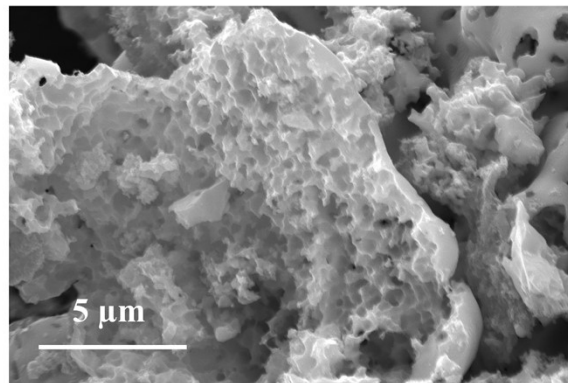

Fig. S3. SEM image of the broken part of hp-Ge particles

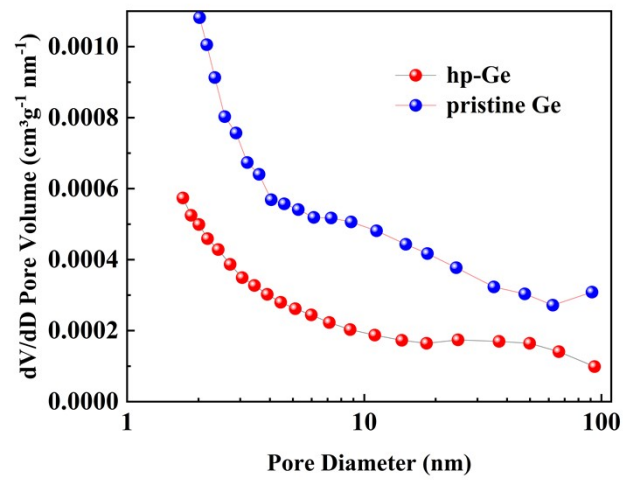

Fig. S4. Pore size distribution of hp-Ge and pristine Ge

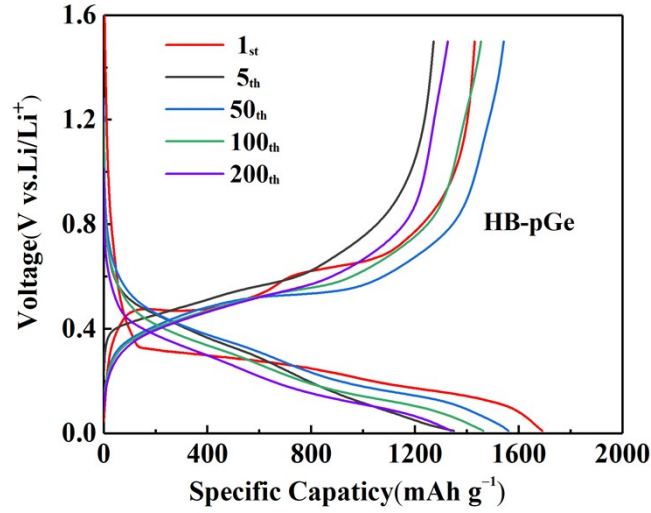

Fig. S5. Discharge/charge potential profiles of hp-Ge electrode at 0.5 A g<sup>-1</sup>.

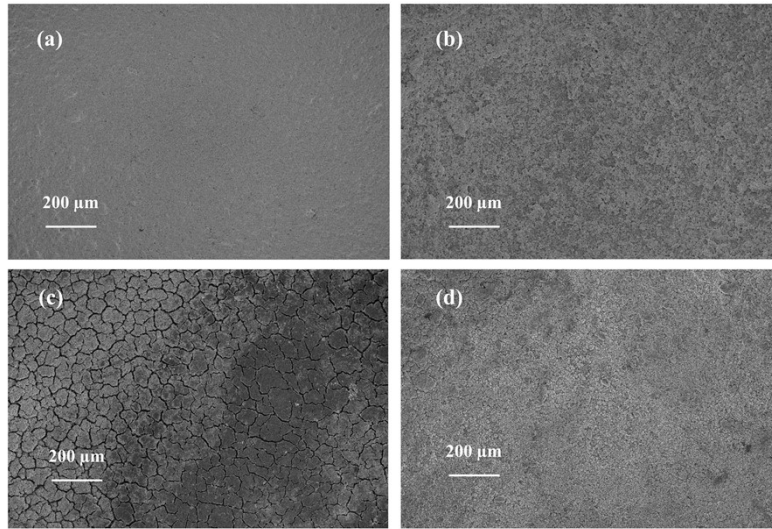

Fig. S6 (a, c) SEM images of the pristine Ge electrode surface before and after cycling; (b, d) SEM images of the hp-Ge electrode surface before and after cycling

Table S1 Comparison of the electrochemical performance of hp-Ge electrode with those in previous reports

| Sample                           | Synthesis method                               | Capacity (mAh g <sup>-1</sup> @ A g <sup>-1</sup> ) | Cycling stability                                                                                  | Rate capability (mAh g <sup>-1</sup> @A g <sup>-1</sup> ) | Ref. |
|----------------------------------|------------------------------------------------|-----------------------------------------------------|----------------------------------------------------------------------------------------------------|-----------------------------------------------------------|------|
|                                  |                                                |                                                     | Capacity (mAh g <sup>-1</sup> @ A g <sup>-1</sup> ), after (n) cycles, capacity retention of (x) % |                                                           |      |
| Ge nanoparticles /graphene oxide | Sodium-reduced                                 | 738 @ 0.2                                           | 532 @ 0.2 , after 15 cycles, 72%                                                                   | /                                                         | 1    |
| Inverse opal Ge film             | Electrodeposition from an ionic liquid         | 1024 @ 0.2 C <sup>a</sup>                           | 844 @ 0.2 C after 50 cycles <sup>a</sup>                                                           | About 500 mAh g <sup>-1</sup> @2.25C <sup>a</sup>         | 2    |
| Ge@C/rGO hybrids                 | High energy mechanical milling                 | 1258.5 @ C/10 <sup>a</sup>                          | 1074.4 @ 2C, after 600 cycles, 96.5%                                                               | 436 @ 20 C                                                | 3    |
| mesoporous Ge particles          | Zincothermic reduction                         | 1450 @ 0.5 C <sup>a</sup>                           | 0.5 C, after 100 cycles, 99.9%                                                                     | 400@2 C                                                   | 4    |
| Ge@C nanowires                   | PVD                                            | 1332 @ 0.5 C <sup>a</sup>                           | 1086 @0.5 C, after 200 cycles, 91% <sup>a</sup>                                                    | 181 @ 24                                                  | 5    |
| Ge/3DOM-Ni                       | Drop-casting PS template/ electrodeposition of | 996 @ 0.2 C <sup>a</sup>                            | 610 @ 0.2 C, after 100 cycles, 61.2%                                                               | 270 @ 10 C <sup>a</sup>                                   | 6    |

|                             |                                                                    |              |                                           |           |              |
|-----------------------------|--------------------------------------------------------------------|--------------|-------------------------------------------|-----------|--------------|
|                             | 3DOM-Ni /reduction of<br>GeO <sub>2</sub> by NaBH <sub>4</sub>     |              |                                           |           |              |
| honeycomb-like<br>porous Ge | thermal nitridation of the<br>Mg <sub>2</sub> Ge in N <sub>2</sub> | 1534.7 @ 0.2 | 1375.40 @0.5, after 200 cycles,<br>93.12% | 483.9 @ 8 | This<br>work |

Note: <sup>a</sup>IC is approximately 1600 mA g<sup>-1</sup>

Table S2 EIS was fitted to the data before and after cycles

| Simple                                  | <i>R<sub>s</sub></i> (ohm) | <i>R<sub>ct</sub></i> (ohm) |
|-----------------------------------------|----------------------------|-----------------------------|
| hp-Ge                                   | 4.193                      | 158.7                       |
| Ge                                      | 7.603                      | 164.00                      |
| After 3 cycles of hp-Ge electrode       | 3.446                      | 52.880                      |
| After 3 cycles of pristine Ge electrode | 4.234                      | 122.70                      |

#### References:

1. J. S. Cheng, J. Du, CrystEngComm. 2012, 14, 397.
2. X. Liu, J.P. Zhao, J. Hao, B.L. Su, Y. Li, J. Mater. Chem. A, 2013, 1, 15076-15081
3. B. Wang, Z. Wen, J. Jin, X. Hong, S. Zhang, K. Rui J. Power Sources 2017, 342: 521-528
4. J. Kim, N.-S. Choi, H.-K. Song, S. Choi, G. Wang, Small 2017, 13(13): 1603045
5. G. H. Yue, X. Q. Zhang, Y. C. Zhao, Q. S. Xie, X. X. Zhang, D. L. Peng, RSC Adv. 2014, 4, 21450
6. X. Liu, Y.-S. Liu, M. M. Harris, J. Li, K.-X. Wang, J.-S. Chen, Chem. Eng. J. 2018, 354: 616-622
